# Supplementary material for: Two chiral Zn(ii) metal–organic frameworks with dinuclear Zn2(COO)3 secondary building units: a 2-D (6,3) net and a 3-D 3-fold interpenetrating (3,5)-connected network
Source: Royal Society of Chemistry journal article supplement (doi:10.1039/c2ce25430a), 2012-01-01
Supplement: c2ce25430a.pdf [file c2ce25430a.pdf]

## Supporting information

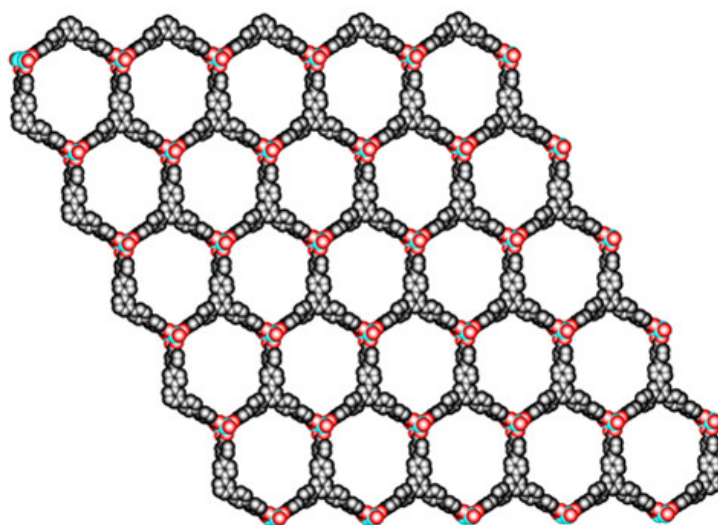

**Fig. S1** View of the 3D porous framework of **1**

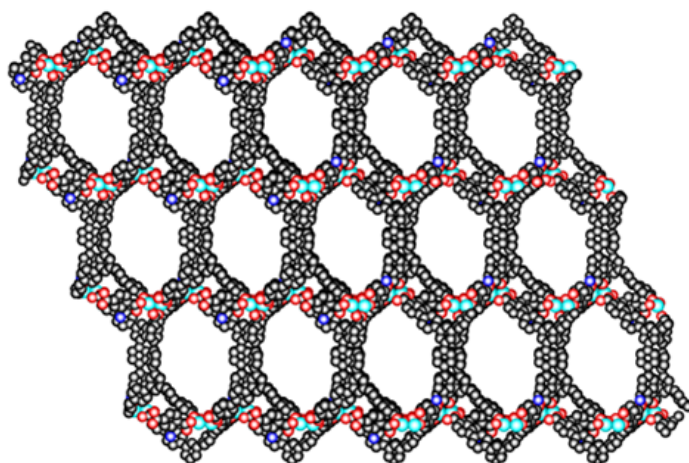

**Fig. S2** View of the 3D porous framework of **2**

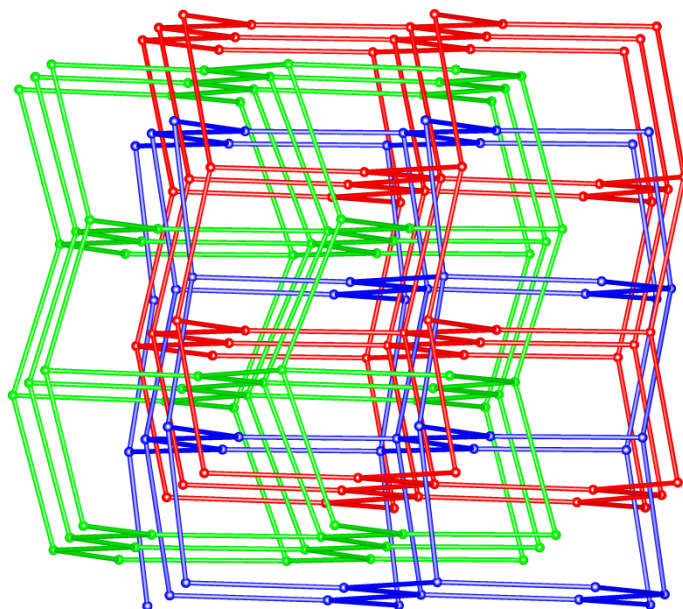

**Fig. S3** Schematic view of the 3-fold interpenetrating (3,5)-connected network in **2**.

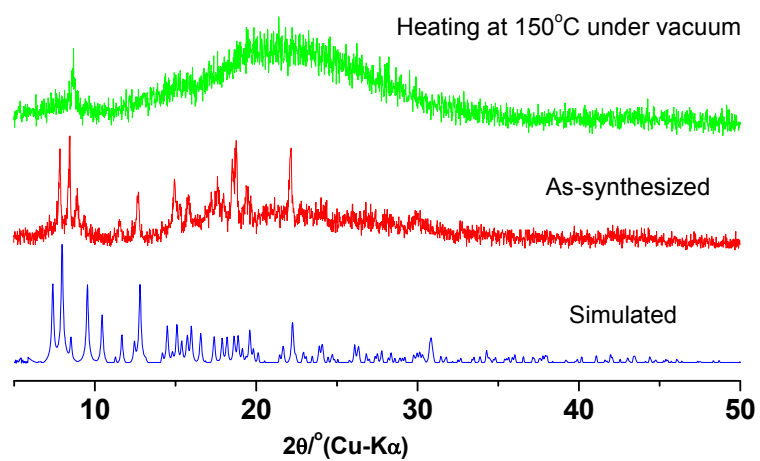

(a)

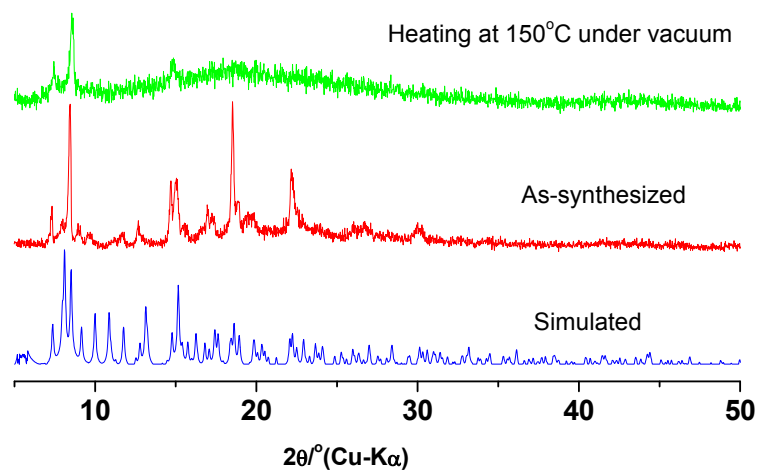

(b)

**Fig. S4** PXRD patterns for **1(a)** and **2(b)**.

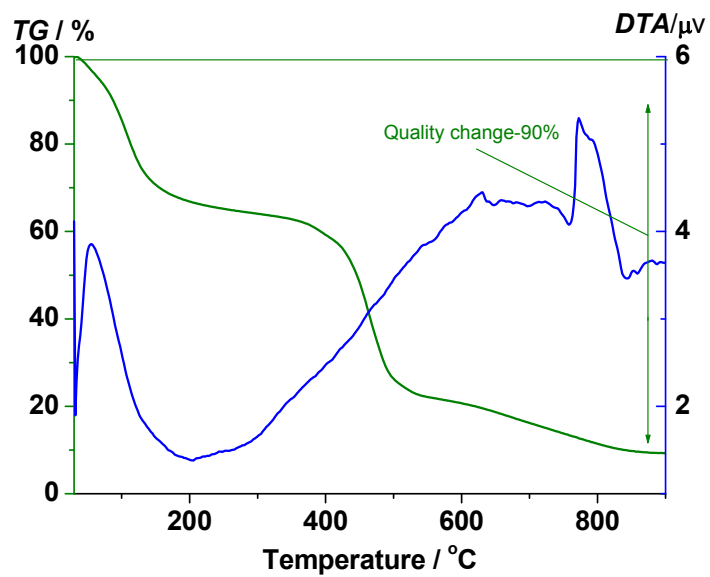

(a)

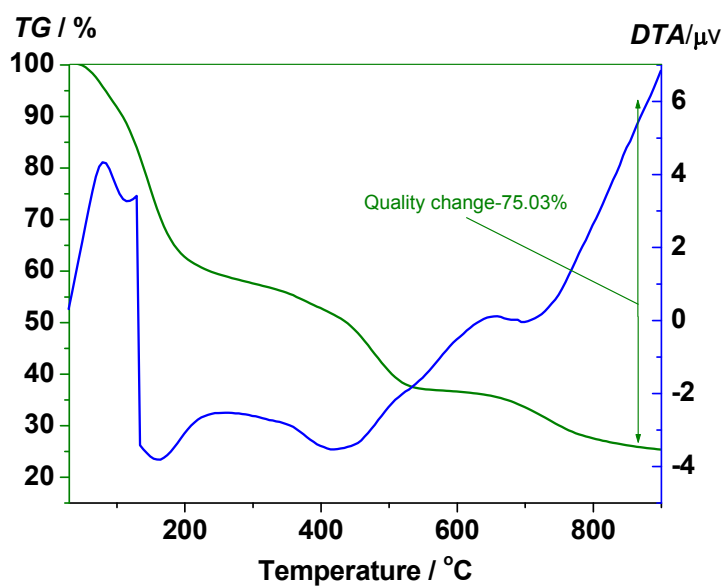

(b)

Fig. S5 The TGA and DTA curves of **1**(a) and **2** (b).

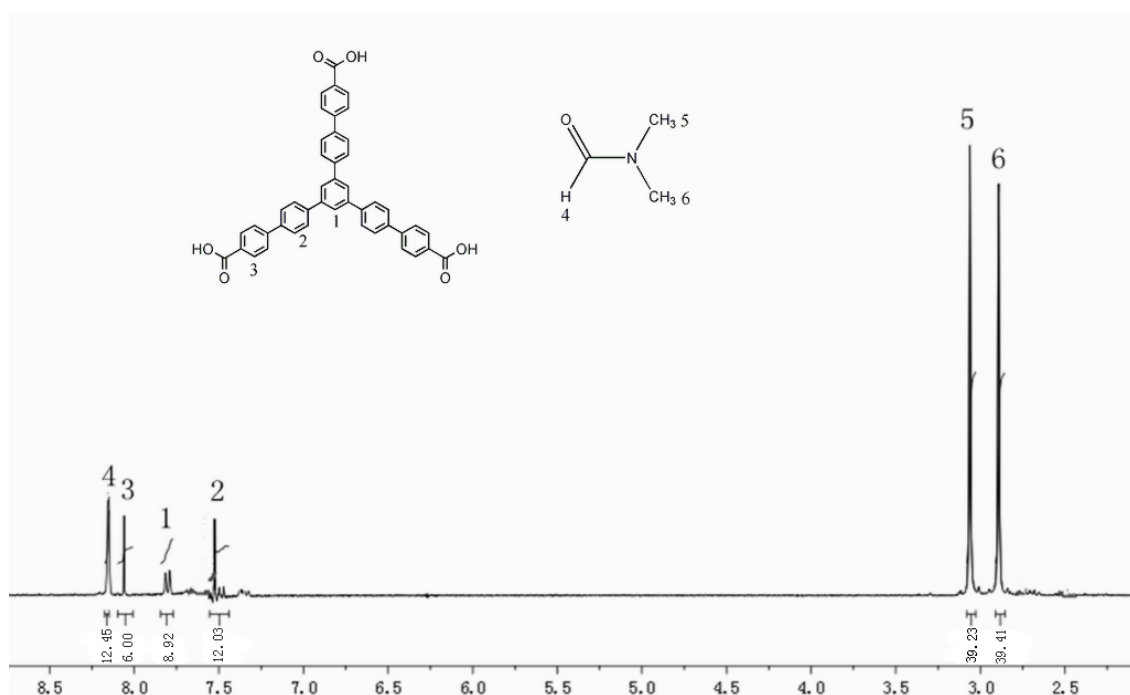

**Fig. S6**  $^1\text{H-NMR}$  spectrum for as-prepared **1** after digesting in DCl solution. The total integration value of 27.0 at peaks 1 to 3 is attributed to 27 aromatic protons for  $\text{H}_3\text{BBC}$ . Comparing to the integration of BBC, 12.4 DMF (peaks 4 to 6, 91.0 H) and 1.0  $(\text{CH}_3)_2\text{NH}_2^+$  were also observed. From the molar ratio, the empirical formula is  $[\text{Zn}(\text{BBC})(\text{H}_2\text{O})_2](\text{Me}_2\text{NH}_2) \cdot 12\text{DMF}$ .

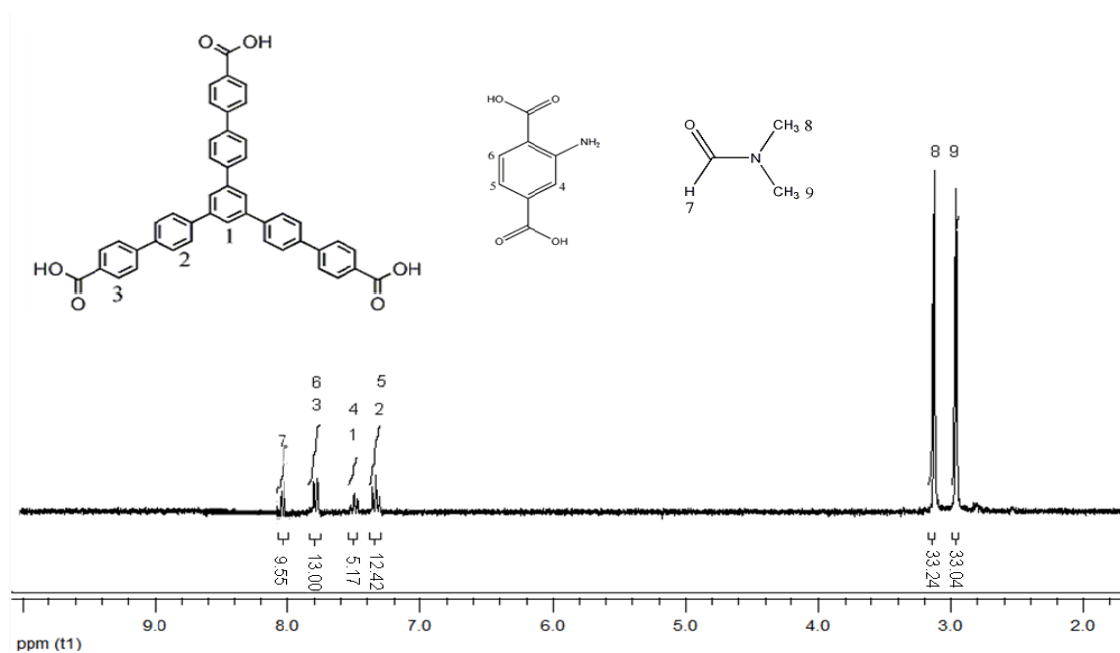

**Fig. S7**  $^1\text{H-NMR}$  spectrum for as-prepared **2** after digesting in DCl solution. The total integration value of 30.0 at peaks 1 to 6 is attributed to 30 aromatic protons for

H<sub>3</sub>BBC and NH<sub>2</sub>-BDC. Comparing to the integration of BBC, 10.0 DMF (peaks 7 to 9, 75.83 H) and 1.0 (CH<sub>3</sub>)<sub>2</sub>NH<sub>2</sub><sup>+</sup> were also observed. From the molar ratio, the empirical formula is [Zn<sub>2</sub>(BBC)(NH<sub>2</sub>-BDC)] (Me<sub>2</sub>NH<sub>2</sub>)·10DMF.

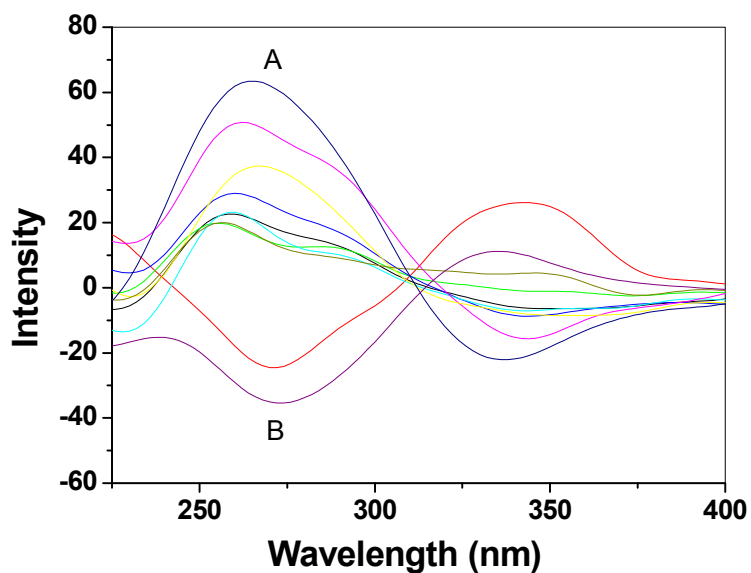

**Fig. S8** Solid-state CD spectra of 10 crystals of compound **2** from one crystallization (calculated ee = 60%), showing A enantiomers and B enantiomers respectively.
